# Supplementary material
Source: ML conference proceedings conference paper supplement (https://proceedings.neurips.cc/paper_files/paper/2022/hash/cf326db238429dac58625977f6fb8265-Abstract.html)
Supplement: Supplementary file 1 [file cf326db238429dac58625977f6fb8265-Supplemental-Conference.pdf]

**Additional notations.** In the appendix, we use the following additional notations. For an integer  $d \geq 1$ , and a vector  $\mathbf{v} \in \mathbb{R}^d$ , the support  $\text{supp}(\mathbf{v}) = \{j \in [d] : v_j \neq 0\}$  denotes the indices of non-zero entries. For an event  $A$  on a probability space  $(\Omega, B, P)$  (which is usually self-understood from the context), we denote by  $I(A)$ ,  $\mathbb{1}\{A\}$ , or  $\mathbb{1}(A)$  its indicator function, such that  $I(A)(\omega) = 1$  if  $\omega \in A$ , and zero otherwise. We denote by  $\Phi$  the cumulative distribution function of the standard normal random variable. For two scalars  $a, b \in \mathbb{R}$ , we write  $a \wedge b = \min(a, b)$ .

## A Properties of Uniform Hashing

---

### Algorithm 2 Encoding-Decoding via Uniform Hashing

---

**input:** cluster  $\mathcal{C}^t$  with  $n \geq 1$  users having data  $X^{t,j}, j = 1, \dots, n$   
**for**  $j = 1, \dots, n$  **do**  
    Generate a uniformly random hash function  $h^{t,j} : [d] \rightarrow [2^b]$  using shared randomness  
    Encode message  $Y^{t,j} = h^{t,j}(X^{t,j})$  and send it to the server ▷ Encoding  
**end for**  
**for**  $k = 1, \dots, d$  **do**  
    Count  $N_k^t(Y^{t,[n]}) \leftarrow |\{j \in [n] : h^{t,j}(k) = Y^{t,j}\}|$  ▷ Decoding  
    Estimate  $\tilde{b}_k^t \leftarrow N_k^t/n$   
**end for**  
**output:**  $\hat{\mathbf{b}}^t$

---

Recall that for all  $t \in [T]$  and  $k \in [d]$ ,  $b_k^t = \frac{p_k^t(2^b-1)+1}{2^b} \in [\frac{1}{2^b}, 1]$ .

**Proposition 1** (Properties of Hashed Estimates). *For each  $t \in [T]$ , suppose  $\check{\mathbf{b}}^t$  is computed in cluster  $\mathcal{C}^t$  as in Algorithm 2 with i.i.d datapoints  $X^{t,j} \sim \text{Cat}(\mathbf{p}^t)$ ,  $\forall j \in [n]$ . Then, it holds that*

1.  $\check{\mathbf{b}}^1, \dots, \check{\mathbf{b}}^T \in [0, 1]$  are independent;
2. for any  $t \in [T]$  and  $k \in [d]$ ,  $N_k^t \sim \text{Binom}(n, b_k^t)$ ;
3.  $\text{supp}(\mathbf{p}^t - \mathbf{p}^*) = \text{supp}(\mathbf{b}^t - \mathbf{b}^*)$  and  $p_k^* = 1$  (or 0) is equivalent to  $b_k^* = 1$  (or  $\frac{1}{2^b}$ , respectively).

*Proof.* Property 1 holds because  $\hat{\mathbf{b}}^1, \dots, \hat{\mathbf{b}}^T$  are obtained by cluster-wise encoding-decoding of independent datapoints. To see property 2, we have for any  $j \in [n]$  and  $k \in [d]$  that

$$\begin{aligned} \mathbb{P}(h^{t,j}(k) = Y^{t,j}) &= \mathbb{P}(k = X^{t,j}) + \mathbb{P}(k \neq X^{t,j} \text{ and } h^{t,j}(k) = h^{t,j}(X^{t,j})) \\ &= p_k^t + (1 - p_k^t) \cdot \frac{1}{2^b} = b_k^t \in \left[\frac{1}{2^b}, 1\right]. \end{aligned}$$

Thus,  $I(h^{t,j}(k) = Y^{t,j})$  is a Bernoulli variable with success probability  $b_k^t$ . Since each datapoint is encoded with an independent hash function,  $N_k^t$  has a binomial distribution with  $n$  trials and parameter  $b_k^t$ . Property 3 directly follows from  $\mathbf{b}^t - \mathbf{b}^* = (\mathbf{p}^t - \mathbf{p}^*)(2^b - 1)/2^b$  and as  $b > 0$ .  $\square$

**Proposition 2** (Property of Debiasing). *For any  $\mathbf{y}, \mathbf{y}^* \in \mathbb{R}^d$ , let  $\mathbf{x} = \text{Proj}_{[0,1]}(\frac{2^b \mathbf{y} - 1}{2^b - 1})$  and  $\mathbf{x}^* = \text{Proj}_{[0,1]}(\frac{2^b \mathbf{y}^* - 1}{2^b - 1})$ . Then it holds that for  $q = 1, 2$ ,  $\mathbb{E}[\|\mathbf{x} - \mathbf{x}^*\|_q^q] = O(\mathbb{E}[\|\mathbf{y} - \mathbf{y}^*\|_q^q])$ . In particular, we have for  $q = 1, 2$  and any  $t \in [T]$ ,  $\mathbb{E}[\|\hat{\mathbf{p}}^t - \mathbf{p}^t\|_q^q] = O(\mathbb{E}[\|\hat{\mathbf{b}}^t - \mathbf{b}^t\|_q^q])$ , where  $\hat{\mathbf{p}}^t = \text{Proj}_{[0,1]}(\frac{2^b \hat{\mathbf{b}}^t - 1}{2^b - 1})$  is the final per-cluster estimate obtained in Algorithm 1.*

*Proof.* Using the inequality that  $|\text{Proj}_{[0,1]}(x) - \text{Proj}_{[0,1]}(y)| \leq |x - y|$  for any  $x, y \in \mathbb{R}$ , we have

$$\begin{aligned} \mathbb{E}[\|\mathbf{x} - \mathbf{x}^*\|_q^q] &= \sum_{k \in [d]} \mathbb{E} \left[ \left| \text{Proj}_{[0,1]} \left( \frac{2^b y_k - 1}{2^b - 1} \right) - \text{Proj}_{[0,1]} \left( \frac{2^b y_k^* - 1}{2^b - 1} \right) \right|^q \right] \\ &\leq \sum_{k \in [d]} \mathbb{E} \left[ \left| \frac{2^b (y_k - y_k^*)}{2^b - 1} \right|^q \right] = \left( \frac{2^b}{2^b - 1} \right)^q \mathbb{E}[\|\mathbf{y} - \mathbf{y}^*\|_q^q] = O(\mathbb{E}[\|\mathbf{y} - \mathbf{y}^*\|_q^q]). \end{aligned}$$

In the last step, we used that  $2^b/(2^b - 1) \leq 2$  for all  $b \geq 1$ , and thus the  $O(\cdot)$  only depends on universal constants.  $\square$

## B General Lemmas

In this section, we state some general lemmas that will be used in the analysis.

**Lemma 2** (Berry-Esseen Theorem; [55]). *Assume that  $Z_1, \dots, Z_n$  are i.i.d. copies of a random variable  $Z$  with mean  $\mu$ , variance  $\sigma^2 > 0$ , and such that  $\mathbb{E}[|Z - \mu|^3] < \infty$ . Then,*

$$\sup_{x \in \mathbb{R}} \left| \mathbb{P} \left\{ \sqrt{n} \frac{\bar{Z} - \mu}{\sigma} \leq x \right\} - \Phi(x) \right| \leq 0.4748 \frac{\gamma(Z)}{\sqrt{n}},$$

where  $\bar{Z} = \frac{1}{n} \sum_{i=1}^n Z_i$  and  $\gamma(Z) = \mathbb{E}[|Z - \mu|^3]/\sigma^3$  is the absolute skewness of  $Z$ .

**Lemma 3** (Hoeffding's Inequality; [55]). *Let  $Z_1, \dots, Z_n \in [l, r]$ ,  $l < r$ , be independent random variables and let  $\bar{Z} = \frac{1}{n} \sum_{j=1}^n Z_j$ . Then for any  $\delta \geq 0$ ,*

$$\max\{\mathbb{P}(\bar{Z} - \mathbb{E}[\bar{Z}] > \delta), \mathbb{P}(\bar{Z} - \mathbb{E}[\bar{Z}] < -\delta)\} \leq \exp\left(-\frac{2n\delta^2}{(r-l)^2}\right).$$

**Lemma 4** (Bernstein's Inequality; [54]). *Let  $Z_1, \dots, Z_n$  be i.i.d. copies of a random variable  $Z$  with  $|Z - \mathbb{E}[Z]| \leq M$ ,  $M > 0$  and  $\text{Var}(Z_1) = \sigma^2 > 0$ , and let  $\bar{Z} = \frac{1}{n} \sum_{j=1}^n Z_j$ . Then for any  $\delta \geq 0$ ,*

$$\mathbb{P}(|\bar{Z} - \mathbb{E}[\bar{Z}]| > \delta) \leq 2 \exp\left(-\frac{n\delta^2}{2(\sigma^2 + M\delta)}\right) \leq 2 \exp\left(-\frac{n}{4} \min\left\{\frac{\delta^2}{\sigma^2}, \frac{\delta}{M}\right\}\right). \quad (6)$$

The second inequality above directly follows from  $\frac{1}{a+b} \geq \frac{1}{2} \min\{\frac{1}{a}, \frac{1}{b}\}$  for any  $a, b > 0$ . Note that (6) also allows  $\sigma = 0$  because  $\mathbb{P}(|\bar{Z} - \mathbb{E}[\bar{Z}]| > \delta) = 0$  and  $\min\left\{\delta^2/\sigma^2 \triangleq +\infty, \delta/M\right\} = \frac{\delta}{M}$ . Therefore, we use this lemma for all  $\sigma \geq 0$  below.

### B.1 Analysis Framework

For each  $t \in [T]$ , we denote by

$$\mathcal{K}_\alpha^t = \{k \in [d] : (\check{b}_k^* - \check{b}_k^t)^2 \leq \alpha \check{b}_k^t/n\} \quad (7)$$

the set of entries in which the central estimate  $[\hat{\mathbf{b}}^*]_k$  is adapted to cluster  $\mathcal{C}^t$ . In this language, the final estimates can be expressed as  $\hat{b}_k^t = \check{b}_k^* \mathbb{1}\{k \in \mathcal{K}_\alpha^t\} + \check{b}_k^t \mathbb{1}\{k \notin \mathcal{K}_\alpha^t\}$  for  $t \in [T]$ . Therefore, it holds that, for  $q = 1, 2$ ,

$$\mathbb{E}[\|\hat{\mathbf{b}}^t - \mathbf{b}^t\|_q^q] = \sum_{k \in [d]} \mathbb{E}[\mathbb{1}\{k \in \mathcal{K}_\alpha^t\} |\check{b}_k^* - b_k^t|^q] + \sum_{k \in [d]} \mathbb{E}[\mathbb{1}\{k \notin \mathcal{K}_\alpha^t\} |\check{b}_k^t - b_k^t|^q]. \quad (8)$$

Let  $\mathcal{I}^t \triangleq \{k \in [d] : b_k^t = b_k^*, \text{ i.e., } p_k^t = p_k^*\}$  be set of entries at which the  $t$ -th cluster's distribution  $\mathbf{p}^t$  aligns with the central distribution  $\mathbf{p}^*$ . We next bound the two terms from (8) in Lemmas 5 and 6. These do not need the independence of  $\check{\mathbf{b}}^*$  and  $\check{\mathbf{b}}^t$ , and hence do not require sample splitting despite the division between stages.

**Lemma 5.** *For any  $t \in [T]$ ,  $\alpha \geq 1$  and  $\eta \in (0, 1]$ , with  $\mathcal{K}_\alpha^t$  from (7), we have, for  $q = 1, 2$*

$$\sum_{k \in [d]} \mathbb{E}[\mathbb{1}\{k \in \mathcal{K}_\alpha^t\} |\check{b}_k^* - b_k^t|^q] = O\left(\mathbb{E}[\|\check{b}_{\mathcal{I}_\eta \cap \mathcal{I}^t}^* - b_{\mathcal{I}_\eta \cap \mathcal{I}^t}^t\|_q^q] + \sum_{k \notin \mathcal{I}_\eta \cap \mathcal{I}^t} \left(\frac{\alpha b_k^t}{n}\right)^{q/2}\right).$$

*Proof.* We first take  $q = 1$ . For any  $k \in [d]$ , clearly

$$\mathbb{E}[\mathbb{1}\{k \in \mathcal{K}_\alpha^t\} |\check{b}_k^* - b_k^t|] \leq \mathbb{E}[|\check{b}_k^* - b_k^t|]. \quad (9)$$

We use this bound for  $k \in \mathcal{I}_\eta \cap \mathcal{I}^t$ . For  $k \notin \mathcal{I}_\eta \cap \mathcal{I}^t$ , we instead bound

$$\mathbb{E}[\mathbb{1}\{k \in \mathcal{K}_\alpha^t\}|\check{b}_k^* - b_k^t|] \leq \mathbb{E}[\mathbb{1}\{k \in \mathcal{K}_\alpha^t\}|\check{b}_k^* - \check{b}_k^t|] + \mathbb{E}[\mathbb{1}\{k \in \mathcal{K}_\alpha^t\}|\check{b}_k^t - b_k^t|].$$

If  $k \in \mathcal{K}_\alpha^t$ , it holds by definition that  $|\check{b}_k^* - \check{b}_k^t| \leq \sqrt{\alpha \check{b}_k^t/n}$ , thus we further have

$$\begin{aligned} \mathbb{E}[\mathbb{1}\{k \in \mathcal{K}_\alpha^t\}|\check{b}_k^* - b_k^t|] &\leq \mathbb{E}\left[\mathbb{1}\{k \in \mathcal{K}_\alpha^t\}\sqrt{\alpha \check{b}_k^t/n}\right] + \mathbb{E}[\mathbb{1}\{k \in \mathcal{K}_\alpha^t\}|\check{b}_k^t - b_k^t|] \\ &\leq \mathbb{E}\left[\sqrt{\alpha \check{b}_k^t/n}\right] + \mathbb{E}[|\check{b}_k^t - b_k^t|]. \end{aligned} \quad (10)$$

By Jensen's inequality and since  $n\check{b}_k^t \sim \text{Binom}(n, b_k^t)$ , we have

$$\mathbb{E}\left[\sqrt{\check{b}_k^t}\right] \leq \sqrt{\mathbb{E}[\check{b}_k^t]} = \sqrt{b_k^t} \quad (11)$$

and

$$\mathbb{E}[|\check{b}_k^t - b_k^t|] \leq \sqrt{\mathbb{E}[(\check{b}_k^t - b_k^t)^2]} = \sqrt{\frac{b_k^t(1-b_k^t)}{n}} \leq \sqrt{\frac{b_k^t}{n}}. \quad (12)$$

Plugging (11) and (12) into (10), we find

$$\mathbb{E}[\mathbb{1}\{k \in \mathcal{K}_\alpha^t\}|\check{b}_k^* - b_k^t|] \leq (\sqrt{\alpha} + 1)\sqrt{\frac{b_k^t}{n}} = O\left(\sqrt{\frac{\alpha b_k^t}{n}}\right). \quad (13)$$

Summing up (9) over all entries in  $\mathcal{I}_\eta \cap \mathcal{I}^t$  and summing up (13) over all entries not in  $\mathcal{I}_\eta \cap \mathcal{I}^t$  leads to the claim for  $q = 1$  in Lemma 5. The case  $q = 2$  follows by a similar argument.  $\square$

**Lemma 6.** For any  $t \in [T]$ ,  $\alpha \geq 1$  and  $\eta \in (0, 1]$ , with  $\mathcal{K}_\alpha^t$  from (7), we have, for  $q = 1, 2$

$$\begin{aligned} &\sum_{k \in [d]} \mathbb{E}[\mathbb{1}\{k \notin \mathcal{K}_\alpha^t\}|\check{b}_k^t - b_k^t|^q] \\ &= O\left(\sum_{k \in \mathcal{I}_\eta \cap \mathcal{I}^t} \mathbb{P}(k \notin \mathcal{K}_\alpha^t) \wedge \left(\frac{b_k^t(1-b_k^t)}{n}\right)^{q/2} + \sum_{k \notin \mathcal{I}_\eta \cap \mathcal{I}^t} \left(\frac{b_k^t}{n}\right)^{q/2}\right). \end{aligned}$$

*Proof.* For  $q = 1$ , note that

$$\mathbb{E}[\mathbb{1}\{k \notin \mathcal{K}_\alpha^t\}|\check{b}_k^t - b_k^t|] \leq \mathbb{P}(k \notin \mathcal{K}_\alpha^t) \quad (14)$$

and

$$\mathbb{E}[\mathbb{1}\{k \notin \mathcal{K}_\alpha^t\}|\check{b}_k^t - b_k^t|] \leq \mathbb{E}[|\check{b}_k^t - b_k^t|]. \quad (15)$$

Combining (14), (15) with the first inequality in (12) for  $k \in \mathcal{I}_\eta \cap \mathcal{I}^t$ , and using the last inequality in (12) for  $k \notin \mathcal{I}_\eta \cap \mathcal{I}^t$  leads to the claim with  $q = 1$ . We can similarly obtain the bound with  $q = 2$ .  $\square$

Combing Lemma 5 and 6 with (8), we find the following proposition:

**Proposition 3.** For any  $\alpha \geq 1$ , and  $q = 1, 2$ , it holds that

$$\begin{aligned} \mathbb{E}[\|\hat{\mathbf{b}}^t - \mathbf{b}^t\|_q^q] &= O\left(\sum_{k \notin \mathcal{I}_\eta \cap \mathcal{I}^t} \left(\frac{\alpha b_k^t}{n}\right)^{q/2} \right. \\ &\quad \left. + \sum_{k \in \mathcal{I}_\eta \cap \mathcal{I}^t} \mathbb{P}(k \notin \mathcal{K}_\alpha^t) \wedge \left(\frac{b_k^t(1-b_k^t)}{n}\right)^{q/2} + \mathbb{E}[\|\check{b}_{\mathcal{I}_\eta \cap \mathcal{I}^t}^* - b_{\mathcal{I}_\eta \cap \mathcal{I}^t}^*\|_q^q]\right). \end{aligned}$$

Proposition 3 does not rely on how  $\check{\mathbf{b}}^*$  is obtained. The next part is devoted to proving that when  $\check{\mathbf{b}}^*$  is obtained via a certain robust estimate, the bounds in Proposition 3 are small for certain values of  $\alpha$  and  $\eta$ .

## C Median-Based Method

In this section, we provide the proofs for the median-based SHIFT method. We first re-state the detailed version of some key results that apply to both the  $\ell_2$  and  $\ell_1$  errors.

Below, we use  $\sigma_k = \sqrt{b_k^*(1 - b_k^*)}$  to denote the standard deviation of the Bernoulli variable with success probability  $b_k^* = p_k^* + (1 - p_k^*)/2^b$ . We also recall that  $\mathcal{B}_k$  is defined as the set of clusters with distributions mismatched with the central distribution at the  $k$ -th entry, i.e.,  $\mathcal{B}_k = \{t \in [T] : p_k^t \neq p_k^*\}$ , and  $\mathcal{I}_\eta$  is defined as the  $\eta$ -well-aligned entries, i.e.,  $\mathcal{I}_\eta = \{k \in [d] : |\mathcal{B}_k| < \eta T\}$ .

**Lemma 7** (Detailed statement of Lemma 1). *Suppose  $\check{\mathbf{b}}^* = \text{median}(\{\check{\mathbf{b}}^t\}_{t \in [T]})$ . Then for any  $0 < \eta \leq \frac{1}{5}$ ,  $k \in \mathcal{I}_\eta$ , and  $q = 1, 2$ , it holds that*

$$\mathbb{E}[|\check{b}_k^* - b_k^*|^q] = \tilde{O} \left( \left( \frac{|\mathcal{B}_k| \sigma_k}{T \sqrt{n}} \right)^q + \left( \frac{\sigma_k}{\sqrt{Tn}} \right)^q + \left( \frac{1}{n} \right)^q \right).$$

Let us define, for  $q = 1, 2$ ,

$$E(q) \triangleq E(q; n, d, b, T) := \frac{d}{(2^b T n)^{q/2}} + \frac{d}{n^q}.$$

**Proposition 4.** *Suppose  $\check{\mathbf{b}}^* = \text{median}(\{\check{\mathbf{b}}^t\}_{t \in [T]})$ . Then for any  $0 < \eta \leq \frac{1}{5}$  and  $q = 1, 2$ , it holds that*

$$\mathbb{E}[\|\check{\mathbf{b}}_{\mathcal{I}_\eta}^* - \mathbf{b}_{\mathcal{I}_\eta}^*\|_q^q] = \tilde{O} \left( \sum_{k \in \mathcal{I}_\eta} \left( \frac{|\mathcal{B}_k| \sigma_k}{T \sqrt{n}} \right)^q + E(q) \right).$$

We omit the proofs of Proposition 4 and Theorem 6 (below), as Proposition 4 is a direct corollary of Lemma 7 by using  $\sum_{k \in [d]} \sigma_k^q = O(d/2^{bq/2})$  for  $q = 1, 2$ , and Theorem 6 follows from the same analysis as Theorem 5.

**Theorem 5** (Detailed statement of Theorem 1). *Suppose  $n \geq 2^{b+6} \ln(n)$  and  $\alpha \geq 2(8 + \sqrt{8 \ln(n)})^2$  with  $\alpha = O(\ln(n))$ . Then for the median-based SHIFT method, for any  $0 < \eta \leq \frac{1}{5}$ ,  $q = 1, 2$ , and  $t \in [T]$ ,*

$$\mathbb{E}[\|\hat{\mathbf{p}}^t - \mathbf{p}^t\|_q^q] = \tilde{O} \left( \sum_{k \notin \mathcal{I}_\eta \cap \mathcal{I}^t} \left( \frac{b_k^t}{n} \right)^{q/2} + \sum_{k \in \mathcal{I}_\eta \cap \mathcal{I}^t} \left( \frac{|\mathcal{B}_k| 2^b b_k^*}{T^2 n} \right)^{q/2} + E(q) \right).$$

Furthermore, by setting  $\eta = \Theta(1)$  with  $\eta \leq \frac{1}{5}$ , we have

$$\mathbb{E}[\|\check{\mathbf{p}}^t - \mathbf{p}^t\|_q^q] = \tilde{O} \left( s^{1-q/2} \left( \frac{\max\{2^b, s\}}{2^b n} \right)^{q/2} + E(q) \right).$$

**Theorem 6** (Detailed statement of Theorem 2). *Suppose  $n \geq \tilde{n} \geq 2^{b+6} \ln(\tilde{n})$  and  $\alpha \geq 2(8 + \sqrt{8 \ln(\tilde{n})})^2$  with  $\alpha = O(\ln(\tilde{n}))$ . Then the median-based SHIFT method for predicting the distribution of the new cluster with  $\tilde{n}$  users achieves, for  $q = 1, 2$ ,*

$$\mathbb{E}[\|\check{\mathbf{p}}^{T+1} - \mathbf{p}^{T+1}\|_q^q] = \tilde{O} \left( s^{1-q/2} \left( \frac{\max\{2^b, s\}}{2^b \tilde{n}} \right)^{q/2} + E(q) \right).$$

### C.1 Proof of Lemma 7

We first consider  $T \leq 20 \ln(n)$ . In this case, by Bernstein's inequality (Lemma 4) with  $M = 1$ , we have for any  $t \in [T] \setminus \mathcal{B}_k$  that for any  $\delta \geq 0$ ,

$$\mathbb{P}(|\check{b}_k^t - b_k^*| > \delta) \leq 2e^{-\frac{\eta}{4} \min\{\delta^2/\sigma_k^2, \delta\}}. \quad (16)$$

Taking  $\delta = \max\{\sigma_k \sqrt{8 \ln(n)/n}, 8 \ln(n)/n\}$  in (16), we find

$$\mathbb{P}\left(|\check{b}_k^t - b_k^*| > \max\left\{\sigma_k \sqrt{\frac{8 \ln(n)}{n}}, \frac{8 \ln(n)}{n}\right\}\right) \leq \frac{2}{n^2}. \quad (17)$$

Since  $|[T] \setminus \mathcal{B}_k| > \frac{T}{2}$  for any  $k \in \mathcal{I}_\eta$  with  $\eta \leq \frac{1}{5}$ , we have, since  $\check{b}_k^* = \text{median}(\{\check{b}_k^t\}_{t \in [T]})$ , that there are  $t_-, t_+ \in [T] \setminus \mathcal{B}_k$  with  $\check{b}_k^{t_-} \leq \check{b}_k^* \leq \check{b}_k^{t_+}$ . Hence,  $|\check{b}_k^* - b_k^*| \leq \max_{t \in [T] \setminus \mathcal{B}_k} |\check{b}_k^t - b_k^*|$ .

Recall that for any random variable  $0 \leq X \leq 1$  and any  $\delta \geq 0$ ,  $\mathbb{E}[X] \leq \delta + \mathbb{P}(X \geq \delta)$ . Therefore, by taking the union bound of (17) over  $k \in [T] \setminus \mathcal{B}_k$ , and by the assumption that  $T \leq 20 \ln(n)$ , we have

$$\begin{aligned} \mathbb{E}[|\check{b}_k^* - b_k^*|] &\leq \mathbb{E}[\max_{k \in [T] \setminus \mathcal{B}_k} |\check{b}_k^t - b_k^*|] \leq \sigma_k \sqrt{\frac{8 \ln(n)}{n}} + \frac{8 \ln(n)}{n} + \frac{2T}{n^2} \\ &= O\left(\sigma_k \sqrt{\frac{\ln(n)}{n}} + \frac{\ln(n)}{n}\right) = O\left(\sigma_k \frac{\ln(n)}{\sqrt{Tn}} + \frac{\ln(n)}{n}\right) = \tilde{O}\left(\frac{\sigma_k}{\sqrt{Tn}} + \frac{1}{n}\right). \end{aligned} \quad (18)$$

Similarly, we have

$$\mathbb{E}[(\check{b}_k^* - b_k^*)^2] \leq \sigma_k^2 \frac{8 \ln(n)}{n} + \frac{64 \ln(n)^2}{n^2} + \frac{2T}{n^2} = \tilde{O}\left(\frac{\sigma_k^2}{Tn} + \frac{1}{n^2}\right). \quad (19)$$

For each  $k \in [d]$  with  $b_k^* \neq 1$  (recall that  $b_k^* \geq 1/2^b$  by definition), let  $\gamma_k = (1 - 2b_k^*(1 - b_k^*))/\sqrt{b_k^*(1 - b_k^*)}$ , and let  $\tilde{F}_k(x) := \frac{1}{T - |\mathcal{B}_k|} \sum_{t \in [T] \setminus \mathcal{B}_k} \mathbb{1}(\check{b}_k^t \leq x)$  be the empirical distribution function of  $\{\check{b}_k^t : b_k^t = b_k^*\}$ . Let  $\varepsilon \in (0, 1/2)$  and  $C_\varepsilon = \sqrt{2\pi} \exp((\Phi^{-1}(1 - \varepsilon))^2/2)$ . For  $\delta \geq 0$ , define, recalling  $\eta T > |\mathcal{B}_k|$  for all  $k \in \mathcal{I}_\eta$ ,

$$G_{k,T,\delta} = \frac{|\mathcal{B}_k|}{T} + \frac{10^{-8}}{Tn} + \sqrt{\frac{\delta}{T - |\mathcal{B}_k|}}$$

where the term  $\frac{10^{-8}}{Tn}$  is used to overcome some challenges due to the discreteness of empirical distributions, and can be replaced with other suitably small terms (see the proof of Lemma 9). Further, define

$$G'_{k,T,\delta} = G_{k,T,\delta} + 0.4748 \frac{\gamma_k}{\sqrt{n}}.$$

To prove Lemma 1 for  $T > 20 \ln(n)$ , we need the following additional lemmas:

**Lemma 8.** *For any  $\delta \geq 0$  such that*

$$G'_{k,T,\delta} \leq \frac{1}{2} - \varepsilon, \quad (20)$$

*it holds with probability at least  $1 - 4e^{-2\delta}$  that*

$$\tilde{F}_k\left(b_k^* + C_\varepsilon \frac{\sigma_k}{\sqrt{n}} G'_{k,T,\delta}\right) \geq \frac{1}{2} + \frac{|\mathcal{B}_k|}{T} + \frac{10^{-8}}{Tn}$$

*and*

$$\tilde{F}_k\left(b_k^* - C_\varepsilon \frac{\sigma_k}{\sqrt{n}} G'_{k,T,\delta}\right) \leq \frac{1}{2} - \frac{|\mathcal{B}_k|}{T} - \frac{10^{-8}}{Tn}.$$

*Proof.* The proof essentially follows Lemma 1 of [58]. We provide the proof for the sake of being self-contained.

Let  $Z_k^t = (\check{b}_k^t - b_k^t)/\sqrt{\text{Var}(\check{b}_k^t)}$  be a standardized version of  $\check{b}_k^t$  for each  $t \in [T]$  and  $k \in [d]$ , with  $b_k^* \neq 1$ . Let  $\tilde{\Phi}_k(z) = \frac{1}{T - |\mathcal{B}_k|} \sum_{t \in [T] \setminus \mathcal{B}_k} \mathbb{1}(Z_k^t \leq z)$  be the empirical distribution of  $\{Z_k^t : t \in [T] \setminus \mathcal{B}_k\}$ . The distribution of  $Z_k^t$  is identical  $t \in [T] \setminus \mathcal{B}_k$ , and we denote by  $\Phi_k$  their common cdf.

By definition,  $\mathbb{E}[\tilde{\Phi}_k(z)] = \Phi_k(z)$  for any  $z \in \mathbb{R}$ . Let  $z_1 > 0 > z_2$  be such that  $\Phi(z_1) = \frac{1}{2} + G'_{k,T,\delta}$  and  $\Phi(z_2) = \frac{1}{2} - G'_{k,T,\delta}$ , which exist due to (20). Then, by Lemma 2, we have

$$\Phi_k(z_1) \geq \frac{1}{2} + G_{k,T,\delta} \quad \text{and} \quad \Phi_k(z_2) \leq \frac{1}{2} - G_{k,T,\delta}. \quad (21)$$

Further, by the Hoeffding's inequality, we have for any  $\delta \geq 0$  and  $z \in \mathbb{R}$ ,

$$\left| \tilde{\Phi}_k(z) - \Phi_k(z) \right| \leq \sqrt{\frac{\delta}{T - |\mathcal{B}_k|}} \quad (22)$$

with probability at least  $1 - 2e^{-2\delta}$ . Then, by a union bound of (22) for  $z = z_1, z_2$ , and by (21), it holds with probability at least  $1 - 4e^{-2\delta}$  that

$$\tilde{\Phi}_k(z_1) \geq \frac{1}{2} + \frac{|\mathcal{B}_k|}{T} + \frac{10^{-8}}{Tn} \quad \text{and} \quad \tilde{\Phi}_k(z_2) \leq \frac{1}{2} - \frac{|\mathcal{B}_k|}{T} - \frac{10^{-8}}{Tn}. \quad (23)$$

Finally, we bound the values of  $z_1$  and  $z_2$ . By the mean value theorem, there exists  $\xi \in [0, z_1]$  such that

$$G'_{k,T,\delta} = z_1 \Phi'(\xi) = \frac{z_1}{\sqrt{2\pi}} e^{-\frac{\xi^2}{2}} \geq \frac{z_1}{\sqrt{2\pi}} e^{-\frac{z_1^2}{2}}. \quad (24)$$

By (20) and the definition of  $z_1$ , we have  $z_1 \leq \Phi^{-1}(1 - \varepsilon)$ , and thus, by (24), we have

$$z_1 \leq \sqrt{2\pi} G'_{k,T,\delta} \exp\left(\frac{1}{2}(\Phi^{-1}(1 - \varepsilon))^2\right). \quad (25)$$

Similarly, we have

$$z_1 \geq -\sqrt{2\pi} G'_{k,T,\delta} \exp\left(\frac{1}{2}(\Phi^{-1}(1 - \varepsilon))^2\right). \quad (26)$$

Since for all  $z$ ,  $\tilde{\Phi}_k(z) = \tilde{F}_k(\sigma_k z / \sqrt{n} + b_k^*)$ , plugging (25) and (26) into (23), we find the conclusion of this lemma.  $\square$

This leads to our next result.

**Lemma 9.** *For any  $k \in [d]$  such that condition (20) holds, we have with probability at least  $1 - 4e^{-2\delta}$  that*

$$\left| \check{b}_k^t - b_k^t \right| \leq C_\varepsilon \frac{\sigma_k}{\sqrt{n}} G'_{k,T,\delta} + \frac{0.4748 C_\varepsilon}{n}. \quad (27)$$

*Proof.* Let  $\hat{F}_k$  be the empirical distribution function of  $\{\check{b}_k^t : t \in [T]\}$ , such that for all  $x \in \mathbb{R}$ ,  $\hat{F}_k(x) := \frac{1}{T} \sum_{t \in [T]} \mathbb{1}(\check{b}_k^t \leq x)$ . We have

$$\begin{aligned} |\hat{F}_k(x) - \tilde{F}_k(x)| &= \left| \frac{1}{T} \sum_{t \in [T]} \mathbb{1}(\check{b}_k^t \leq x) - \frac{1}{T - |\mathcal{B}_k|} \sum_{t \in [T] \setminus \mathcal{B}_k} \mathbb{1}(\check{b}_k^t \leq x) \right| \\ &= \left| \frac{1}{T} \sum_{t \in \mathcal{B}_k} \mathbb{1}(\check{b}_k^t \leq x) - \frac{|\mathcal{B}_k|}{T(T - |\mathcal{B}_k|)} \sum_{t \in [T] \setminus \mathcal{B}_k} \mathbb{1}(\check{b}_k^t \leq x) \right| \\ &\leq \max \left\{ \frac{1}{T} \cdot |\mathcal{B}_k|, \frac{|\mathcal{B}_k|}{T(T - |\mathcal{B}_k|)} \cdot (T - |\mathcal{B}_k|) \right\} = \frac{|\mathcal{B}_k|}{T}. \end{aligned} \quad (28)$$

Define  $\tilde{F}_k^-(x) := \frac{1}{T - |\mathcal{B}_k|} \sum_{t \in [T] \setminus \mathcal{B}_k} \mathbb{1}(\check{b}_k^t < x) \leq \tilde{F}_k(x)$ . Then by (28) and Lemma 8, we have, with probability at least  $1 - 4e^{-2\delta}$  that

$$\hat{F}_k \left( b_k^* + C_\varepsilon \frac{\sigma_k}{\sqrt{n}} G'_{k,T,\delta} \right) \geq \frac{1}{2} + \frac{10^{-8}}{Tn} \quad \text{and} \quad \hat{F}_k^- \left( b_k^* - C_\varepsilon \frac{\sigma_k}{\sqrt{n}} G'_{k,T,\delta} \right) \leq \frac{1}{2} - \frac{10^{-8}}{Tn}. \quad (29)$$

Let  $\check{b}_k^{(j)}$ ,  $\forall j \in [T]$  be the  $j$ -th smallest element in  $\{\check{b}_k^t : t \in [T]\}$ . Recalling the definition of the median, if  $T$  is odd, then  $\check{b}_k^* = \check{b}_k^{((T+1)/2)}$ . Therefore,  $b_k^* + C_\varepsilon \frac{\sigma_k}{\sqrt{n}} G'_{k,T,\delta} < \check{b}_k^*$  implies  $\hat{F}_k \left( b_k^* + C_\varepsilon \frac{\sigma_k}{\sqrt{n}} G'_{k,T,\delta} \right) \leq \frac{1}{2} - \frac{1}{2T}$  and  $b_k^* - C_\varepsilon \frac{\sigma_k}{\sqrt{n}} G'_{k,T,\delta} > \check{b}_k^*$  implies  $\hat{F}_k^- \left( b_k^* - C_\varepsilon \frac{\sigma_k}{\sqrt{n}} G'_{k,T,\delta} \right) \geq \frac{1}{2} + \frac{1}{2T}$ , leading to a contradiction with (29).

On the other hand, if  $T$  is even,  $\check{b}_k^* = (\check{b}_k^{(T/2)} + \check{b}_k^{(T/2+1)})/2$ . Therefore,  $b_k^* + C_\varepsilon \frac{\sigma_k}{\sqrt{n}} G'_{k,T,\delta} < \check{b}_k^*$  implies  $\hat{F}_k \left( b_k^* + C_\varepsilon \frac{\sigma_k}{\sqrt{n}} G'_{k,T,\delta} \right) \leq \frac{1}{2}$  and  $b_k^* - C_\varepsilon \frac{\sigma_k}{\sqrt{n}} G'_{k,T,\delta} > \check{b}_k^*$  implies  $\hat{F}_k^- \left( b_k^* - C_\varepsilon \frac{\sigma_k}{\sqrt{n}} G'_{k,T,\delta} \right) \geq \frac{1}{2}$ , which is also contradictory to (29).

To summarize, it holds that

$$|\check{b}_k^* - b_k^*| \leq C_\varepsilon \frac{\sigma_k}{\sqrt{n}} G'_{k,T,\delta}$$

with probability at least  $1 - 4e^{-2\delta}$ .  $\square$

If  $T \leq 20 \ln(n)$ , Lemma 7 follows directly from (18) and (19). Now, given Lemma 8 and Lemma 9, we turn to prove Lemma 7 with  $T \geq 20 \ln(n)$ . We first check condition (20). Since  $|\mathcal{B}_k| \leq \eta T$  for any  $k \in \mathcal{I}_\eta$ ,  $\eta \leq \frac{1}{5}$ , and  $\gamma_k \sigma_k \leq 1$ , we have for each  $k \in \mathcal{I}_\eta$  that

$$G'_{k,T,\delta} \leq \eta + \frac{10^{-8}}{Tn} + \sqrt{\frac{5\delta}{4T}} + \frac{0.4748}{\sqrt{n}\sigma_k}.$$

When  $T \geq 20 \ln(n)$ , for any  $k \in [d]$  such that  $\sigma_k \geq \frac{20}{\sqrt{n(1-2\eta)}}$ , taking  $\delta = \ln(n)$  above, we have

$$G'_{k,T,\delta} \leq \eta + 10^{-8} + \frac{1}{4} + 0.4748 \frac{1-2\eta}{20} \leq \frac{1}{2} - 0.035755.$$

Therefore, condition (20) in Lemma 9 is satisfied with  $\varepsilon = 0.035755$ , for which we can check that  $C_\varepsilon \leq 13$ . Thus, for any  $\delta \leq \ln(n)$ ,

$$\mathbb{P} \left( |\check{b}_k^* - b_k^*| \geq 13 \frac{\sigma_k}{\sqrt{n}} G_{k,T,\delta} + \frac{13}{n} \right) \leq 4e^{-2\delta}. \quad (30)$$

Therefore, by (30), we have, using that for any random variable  $0 \leq X \leq 1$  and any  $0 \leq r \leq 1$ ,  $\mathbb{E}[X] \leq r + \mathbb{P}(X \geq r)$ , and that for  $\delta = (\ln n)/2$ , one has  $4e^{-2\delta} = 4/n$ , we find

$$\mathbb{E}[|\check{b}_k^* - b_k^*|] \leq 13 \frac{\sigma_k}{\sqrt{n}} G_{k,T,(\ln n)/2} + \frac{17}{n} = \tilde{O} \left( \frac{\sigma_k}{\sqrt{n}} \frac{|\mathcal{B}_k|}{T} + \frac{\sigma_k}{\sqrt{nT}} + \frac{1}{n} \right). \quad (31)$$

Similarly, by the Cauchy-Schwarz inequality, we also have

$$\begin{aligned} \mathbb{E}[(\check{b}_k^* - b_k^*)^2] &= O \left( \frac{\sigma_k^2}{n} \left( \frac{|\mathcal{B}_k|^2}{T^2} + \frac{\ln(n)}{T - |\mathcal{B}_k|} \right) + \frac{1}{n^2} + e^{-2\ln(n)} \right) \\ &= \tilde{O} \left( \frac{\sigma_k^2}{n} \frac{|\mathcal{B}_k|^2}{T^2} + \frac{\sigma_k^2}{nT} + \frac{1}{n^2} \right). \end{aligned} \quad (32)$$

On the other hand, for any  $k \in [d] \setminus \mathcal{B}_k$  such that  $\sigma_k < \frac{20}{\sqrt{n(1-2\eta)}}$ , by Bernstein's inequality and a union bound, we have

$$\mathbb{P} \left( \max_{k \in [T] \setminus \mathcal{B}_k} |\check{b}_k^t - b_k^*| > \delta \right) \leq 2(T - |\mathcal{B}_k|) e^{-\frac{n}{4} \min\{\delta^2/\sigma_k^2, \delta\}} \leq 2T e^{-\frac{n}{4} \min\{\frac{n(1-2\eta)^2 \delta^2}{400}, \delta\}}. \quad (33)$$

Since  $|[T] \setminus \mathcal{B}_k| > \frac{T}{2}$ , we have as before that  $|\check{b}_k^t - b_k^*| \leq \max_{t \in [T] \setminus \mathcal{B}_k} |\check{b}_k^t - b_k^*|$ . Taking  $\delta = 4 \max\{\ln(Tn^2), 10\sqrt{\ln(Tn^2)}\}/n$  in (33), with the same steps as above, we find

$$\begin{aligned} \mathbb{E}[|\check{b}_k^* - b_k^*|] &\leq \mathbb{E} \left[ \max_{k \in [T] \setminus \mathcal{B}_k} |\check{b}_k^t - b_k^*| \right] \leq \delta + 2T e^{-\frac{n}{4} \min\{\frac{(1-2\eta)^2 n \delta^2}{400}, \delta\}} \\ &\leq \frac{4 \max\{\ln(Tn^2), 10\sqrt{\ln(Tn^2)}\} + 2}{n} = \tilde{O} \left( \frac{1}{n} \right) \end{aligned} \quad (34)$$

and

$$\mathbb{E}[(\check{b}_k^* - b_k^*)^2] \leq \delta^2 + 2Te^{-\frac{n}{4} \min\{\frac{(1-2\eta)^2 n \delta^2}{400}, \delta\}} = \tilde{O}\left(\frac{1}{n^2}\right). \quad (35)$$

To summarize, combining (31), (32) with (34), (35), we complete the proof when  $T > 20 \ln(n)$ .

Furthermore, by using  $\sum_{k \in [d]} \sigma_k^q = O(d/2^{bq/2})$  for  $q = 1, 2$ , we directly reach Proposition 4.

## C.2 Proof of Theorem 5

We first consider the case where  $T \leq 20 \ln(n)$ . By definition,  $\hat{b}_k^t$  is either equal to  $\check{b}_k^t$  or  $\check{b}_k^*$ , and the latter happens only when  $k \in \mathcal{K}_\alpha^t$ , i.e.,  $|\check{b}_k^* - \check{b}_k^t| \leq \sqrt{\alpha \check{b}_k^t/n}$ . In this case, we have

$$|\hat{b}_k^t - b_k^t| = |\check{b}_k^* - b_k^t| \leq |\check{b}_k^t - b_k^t| + |\check{b}_k^* - \check{b}_k^t| \leq |\check{b}_k^t - b_k^t| + \sqrt{\frac{\alpha \check{b}_k^t}{n}}.$$

Therefore, we have  $|\hat{b}_k^t - b_k^t| \leq |\check{b}_k^t - b_k^t| + \sqrt{\alpha \check{b}_k^t/n}$  for all  $k \in [d]$ . This leads to

$$\begin{aligned} \mathbb{E}[\|\hat{\mathbf{b}}^t - \mathbf{b}^t\|_1] &\leq \mathbb{E}[\|\check{\mathbf{b}}^t - \mathbf{b}^t\|_1] + \sqrt{\frac{\alpha}{n}} \sum_{k \in [d]} \mathbb{E}[\sqrt{\check{b}_k^t}] \\ &\leq \mathbb{E}[\|\check{\mathbf{b}}^t - \mathbf{b}^t\|_1] + \sqrt{\frac{\alpha}{n}} \sum_{k \in [d]} \sqrt{\mathbb{E}[\check{b}_k^t]}, \end{aligned} \quad (36)$$

where (36) holds by Jensen's inequality. By further using the Cauchy-Schwarz inequality, we have

$$\mathbb{E}[\|\check{\mathbf{b}}^t - \mathbf{b}^t\|_1] \leq \sqrt{d \mathbb{E}[\|\check{\mathbf{b}}^t - \mathbf{b}^t\|_2^2]} = O\left(\frac{d}{\sqrt{2^b n}}\right) \quad (37)$$

and

$$\sum_{k \in [d]} \sqrt{\mathbb{E}[\check{b}_k^t]} = \sum_{k \in [d]} \sqrt{b_k^t} \leq \sqrt{d \sum_{k \in [d]} b_k^t} = O\left(\frac{d}{\sqrt{2^b}}\right). \quad (38)$$

Plugging (37) and (38) into (36), we find

$$\mathbb{E}[\|\hat{\mathbf{b}}^t - \mathbf{b}^t\|_1] = \tilde{O}\left(\frac{d}{\sqrt{2^b n}}\right) = \tilde{O}\left(\frac{d}{\sqrt{2^b T n}}\right).$$

We can similarly prove

$$\mathbb{E}[\|\check{\mathbf{b}}^t - \mathbf{b}^t\|_2^2] = \tilde{O}\left(\frac{d}{2^b n}\right) = \tilde{O}\left(\frac{d}{2^b T n}\right).$$

Next we prove the case where  $T \geq 20 \ln(n) = \Omega(\ln(n))$ . We first consider the estimation errors over  $k \in \mathcal{I}_\eta \cap \mathcal{I}^t$  such that  $\sigma_k \geq \frac{20}{\sqrt{n}(1-2\eta)}$ . Let  $\mathcal{E}_k^t := \{\check{b}_k^t \geq \frac{1}{2} b_k^t \text{ and } |\check{b}_k^* - b_k^*| \leq 8\sqrt{b_k^*/n}\}$ . If  $n \geq 2^{b+6} \ln(n)$  and  $0 < \eta \leq 1/5$ , then since  $b_k^* \geq \frac{1}{2^b}$  for any  $k \in [d]$ , we have

$$\begin{aligned} 13 \frac{\sigma_k}{\sqrt{n}} G_{k,T,\ln n} + \frac{13}{n} &= 13 \frac{\sigma_k}{\sqrt{n}} \left( \frac{|\mathcal{B}_k|}{T} + \frac{10^{-8}}{Tn} + \sqrt{\frac{\ln(n)}{T - |\mathcal{B}_k|}} \right) + \frac{13}{n} \\ &\leq 13 \frac{\sigma_k}{\sqrt{n}} \left( \frac{|\mathcal{B}_k|}{T} + \frac{10^{-8}}{Tn} + \sqrt{\frac{5 \ln(n)}{4T}} \right) + \frac{13}{n} \leq 13 \frac{\sigma_k}{\sqrt{n}} \left( \frac{1}{5} + 10^{-8} + \frac{1}{4} \right) + \frac{13}{\sqrt{n} 2^{b+6} \ln(n)} \\ &\leq 13 \frac{\sigma_k}{\sqrt{n}} \left( \frac{1}{5} + 10^{-8} + \frac{1}{4} \right) + \frac{13 \sqrt{b_k^*}}{\sqrt{n} 64 \ln(n)} \leq 8 \sqrt{\frac{b_k^*}{n}}. \end{aligned}$$

Hence, by (30), it holds that

$$\mathbb{P}\left(|\check{b}_k^* - b_k^*| \geq 8 \sqrt{\frac{b_k^*}{n}}\right) \leq \frac{4}{n^2}. \quad (39)$$

By Bernstein's inequality and as  $b_k^* \geq \frac{1}{2^b}$ , we have

$$\mathbb{P}\left(\left|\check{b}_k^t - b_k^t\right| > \frac{b_k^t}{2}\right) \leq 2e^{-\frac{n}{4} \min\{\frac{b_k^t}{4(1-b_k^t)}, \frac{b_k^t}{2}\}} \leq 2e^{-\frac{nb_k^t}{16}} \leq 2e^{-\frac{n}{16 \cdot 2^b}} \leq \frac{2}{n^2}, \quad (40)$$

where the last inequality holds because  $n \geq 2^{b+6} \ln(n)$ . Combining (40) with (39), we find  $\mathbb{P}((\mathcal{E}_k^t)^c) \leq \frac{6}{n^2}$ . By definition,  $k \notin \mathcal{K}_\alpha^t$  implies  $|\check{b}_k^* - \check{b}_k^t| > \sqrt{\alpha \check{b}_k^t/n}$ . On the event  $\mathcal{E}_k^t$ , this further implies  $|\check{b}_k^* - \check{b}_k^t| > \sqrt{\alpha b_k^t/2n}$ . Combined with (39) and that  $b_k^* = b_k^t$  for any  $k \in \mathcal{I}^t$ , we have on the event  $\mathcal{E}_k^t$

$$\left|\check{b}_k^t - b_k^t\right| = \left|\check{b}_k^t - b_k^*\right| \geq \left|\check{b}_k^t - \check{b}_k^*\right| - \left|\check{b}_k^* - b_k^*\right| > \sqrt{\frac{b_k^t}{n}} \left(\sqrt{\frac{\alpha}{2}} - 8\right). \quad (41)$$

Let  $\zeta \triangleq \sqrt{\alpha/2} - 8 \geq \sqrt{8 \ln(n)}$  and  $\mathcal{F}_k^t := \left\{\left|\check{b}_k^t - b_k^t\right| \geq \zeta \sqrt{b_k^t/n}\right\}$ . By Bernstein's inequality, and using  $n \geq 2^{b+6} \ln(n)$ , we have

$$\mathbb{P}(\mathcal{F}_k^t) \leq 2e^{-\frac{n}{4} \min\{\frac{\zeta^2}{n(1-b_k^t)}, \zeta \sqrt{\frac{b_k^t}{n}}\}} \leq 2e^{-\min\{\frac{\zeta^2}{4}, \frac{\zeta}{4} \sqrt{\frac{n}{2^b}}\}} \leq \frac{2}{n^2}. \quad (42)$$

Combining (41) with (42), we find that for any  $k \in \mathcal{I}_\eta \cap \mathcal{I}^t$  with  $\sigma_k \geq \frac{20}{\sqrt{n(1-2\eta)}}$ , it holds that

$$\begin{aligned} \mathbb{P}(k \notin \mathcal{K}_\alpha^t) &\leq \mathbb{P}((\mathcal{E}_k^t)^c) + \mathbb{P}(\mathcal{E}_k^t \cap \{k \notin \mathcal{K}_\alpha^t\}) \leq \mathbb{P}((\mathcal{E}_k^t)^c) + \mathbb{P}(\mathcal{E}_k^t \cap \mathcal{F}_k^t) \\ &\leq \mathbb{P}((\mathcal{E}_k^t)^c) + \mathbb{P}(\mathcal{F}_k^t) \leq \frac{8}{n^2}. \end{aligned}$$

On the other hand for any  $k \in \mathcal{I}_\eta \cap \mathcal{I}^t$  with  $\sigma_k < \frac{20}{\sqrt{n(1-2\eta)}}$ , we have

$$\sqrt{\frac{b_k^t(1-b_k^t)}{n}} = \sqrt{\frac{b_k^*(1-b_k^*)}{n}} = \frac{\sigma_k}{\sqrt{n}} = O\left(\frac{1}{n}\right).$$

Therefore, we have for all  $k \in \mathcal{I}_\eta \cap \mathcal{I}^t$ , and  $q = 1, 2$

$$\min\left\{\mathbb{P}(k \notin \mathcal{K}_\alpha^t), \left(\frac{b_k^t(1-b_k^t)}{n}\right)^{q/2}\right\} = O\left(\frac{1}{n^q}\right). \quad (43)$$

Since  $\alpha = O(\ln(n))$ , by (43) and Proposition 3, we obtain

$$\mathbb{E}[\|\hat{\mathbf{b}}^t - \mathbf{b}^t\|_1] = \tilde{O}\left(\sum_{k \notin \mathcal{I}_\eta \cap \mathcal{I}^t} \sqrt{\frac{b_k^t}{n}} + \mathbb{E}[\|\check{\mathbf{b}}_{\mathcal{I}_\eta \cap \mathcal{I}^t}^* - \mathbf{b}_{\mathcal{I}_\eta \cap \mathcal{I}^t}^*\|_1] + \frac{d}{n}\right). \quad (44)$$

Combining (44) with Proposition 4 and using that  $\sigma_k \leq \sqrt{b_k^*} = \sqrt{b_k^t}$  for any  $k \in \mathcal{I}^t$ , we have

$$\mathbb{E}[\|\hat{\mathbf{b}}^t - \mathbf{b}^t\|_1] = \tilde{O}\left(\sum_{k \notin \mathcal{I}_\eta \cap \mathcal{I}^t} \sqrt{\frac{b_k^t}{n}} + \sum_{k \in \mathcal{I}_\eta \cap \mathcal{I}^t} \frac{|\mathcal{B}_k|}{T} \sqrt{\frac{b_k^t}{n}} + E(1)\right). \quad (45)$$

Since  $|(\mathcal{I}^t)^c| = \|\mathbf{p}^t - \mathbf{p}^*\|_0 \leq s$ , by the Cauchy-Schwarz inequality, we have

$$\begin{aligned} \sum_{k \notin \mathcal{I}_\eta \cap \mathcal{I}^t} \sqrt{\frac{b_k^t}{n}} &\leq \sum_{k \notin \mathcal{I}_\eta} \sqrt{\frac{b_k^t}{n}} + \sum_{k \notin \mathcal{I}^t} \sqrt{\frac{b_k^t}{n}} \leq \sum_{k \notin \mathcal{I}_\eta} \sqrt{\frac{b_k^t}{n}} + \sqrt{\frac{s \sum_{k \notin \mathcal{I}^t} b_k^t}{n}} \\ &\leq \sum_{k \notin \mathcal{I}_\eta} \sqrt{\frac{b_k^t}{n}} + \sqrt{\frac{s \sum_{k \notin \mathcal{I}^t} ((2^b - 1)p_k^t + 1)}{2^b n}} \leq \sum_{k \notin \mathcal{I}_\eta} \sqrt{\frac{b_k^t}{n}} + \sqrt{\frac{s(2^b - 1 + s)}{2^b n}}. \end{aligned} \quad (46)$$

Plugging (46) into (44), we further obtain

$$\mathbb{E}[\|\hat{\mathbf{b}}^t - \mathbf{b}^t\|_1] = \tilde{O}\left(\sum_{k \notin \mathcal{I}_\eta} \sqrt{\frac{b_k^t}{n}} + \sum_{k \in \mathcal{I}_\eta} \frac{|\mathcal{B}_k|}{T} \sqrt{\frac{b_k^t}{n}} + \sqrt{\frac{s \max\{2^b, s\}}{2^b n}} + E(1)\right). \quad (47)$$

Similarly, we can reach the following  $\ell_2$  counterpart:

$$\mathbb{E}[\|\widehat{\mathbf{b}}^t - \mathbf{b}^t\|_2^2] = \tilde{O} \left( \sum_{k \notin \mathcal{I}_\eta} \frac{b_k^t}{n} + \sum_{k \in \mathcal{I}_\eta} \frac{|\mathcal{B}_k|^2}{T^2} \frac{b_k^t}{n} + \frac{\max\{2^b, s\}}{2^b n} + E(2) \right). \quad (48)$$

Note that  $\sum_{k \in [d]} |\mathcal{B}_k|/T \leq s$  and for any set  $\mathcal{I}$  with  $|\mathcal{I}| = \lceil \frac{s}{\eta} \rceil$ ,

$$\sum_{k \in \mathcal{I}} \sqrt{\frac{b_k^t}{n}} \leq \sqrt{\frac{|\mathcal{I}| \sum_{k \in \mathcal{I}} ((2^b - 1)p_k^t + 1)}{2^b n}} = O \left( \sqrt{\frac{s/\eta \max\{2^b, s/\eta\}}{2^b n}} \right).$$

Now, recalling the definition of  $\mathcal{I}_\eta$ , we apply Lemma 10 in (47) with  $(r_k, x_k) = (\sqrt{b_k^t/n}, |\mathcal{B}_k|/T)$  for all  $k \in [d]$ , to find

$$\mathbb{E}[\|\widehat{\mathbf{b}}^t - \mathbf{b}^t\|_1] = \tilde{O} \left( \sqrt{\frac{s/\eta \max\{2^b, s/\eta\}}{2^b n}} + E(1) \right).$$

Therefore, for any  $\eta = \Theta(1)$  with  $\eta \leq \frac{1}{5}$ , we finally have

$$\mathbb{E}[\|\widehat{\mathbf{b}}^t - \mathbf{b}^t\|_1] = \tilde{O} \left( \sqrt{\frac{s \max\{2^b, s\}}{2^b n}} + E(1) \right).$$

Similarly, by combining (48) with Lemma 10, we have for any  $\eta = \Theta(1)$  with  $\eta \leq \frac{1}{5}$ ,

$$\mathbb{E}[\|\widehat{\mathbf{b}}^t - \mathbf{b}^t\|_2^2] = \tilde{O} \left( \frac{\max\{2^b, s\}}{2^b n} + E(2) \right).$$

The result directly follows Proposition 2.

**Lemma 10.** *Given  $\eta \in (0, 1]$ ,  $r_k \geq 0$  for all  $k \in [d]$ , and for  $q = 1, 2$ , consider the functions  $f_q : \{x \in \mathbb{R}^d : 0 \leq x_k \leq 1, \forall k \in [d] \text{ and } \sum_{k \in [d]} x_k \leq s\} \rightarrow \mathbb{R}$ ,  $f_q(x_1, \dots, x_d) := \sum_{k \in [d]} r_k^q (\mathbb{1}\{x_k \geq \eta\} + x_k^q \mathbb{1}\{x_k < \eta\})$ . Then it holds that*

$$\max_{x_1, \dots, x_d} f_q(x_1, \dots, x_d) \leq \sum_{k=1}^{\lceil s/\eta \rceil} r_{(k)}^q, \quad (49)$$

where  $r_{(1)} \geq \dots \geq r_{(d)}$  is the non-decreasing rearrangement of  $\{r_1, \dots, r_d\}$ .

*Proof.* We only prove the result for  $f_1$ , and the result for function  $f_2$  follows similarly. Note that  $r_k(\mathbb{1}\{x_k \geq \eta\} + x_k \mathbb{1}\{x_k < \eta\})$  is increasing with respect to  $r_k$  and  $x_k$ . To consider the maximum of the sum in  $f$ , by the rearrangement inequality, without loss of generality, we can assume  $r_1 \geq r_2 \geq \dots \geq r_d \geq 0$  and  $1 \geq x_1 \geq x_2 \geq \dots \geq x_d \geq 0$ . In this case, we claim that the maximum is attained at  $x_1 = \dots = x_{\lfloor s/\eta \rfloor} = \eta$ ,  $x_{\lfloor s/\eta \rfloor + 1} = s - \eta \lfloor s/\eta \rfloor$ , and  $x_k = 0$  for all  $k > \lfloor s/\eta \rfloor + 1$ . Further, the maximum is  $\sum_{k=1}^{\lfloor s/\eta \rfloor} r_k + r_{\lfloor s/\eta \rfloor + 1} (s - \eta \lfloor s/\eta \rfloor)^2$ , which is upper bounded by the right-hand side of (49). We now use the exchange argument to prove the claim.

**Step 1:** If there is some  $k$  such that  $x_k > \eta \geq x_{k+1}$ , then defining  $x'$  by letting  $(x'_k, x'_{k+1}) = (\eta, x_k + x_{k+1} - \eta)$  while for other  $j$ ,  $x'_j = x_j$ , increases the value of  $f$ . Therefore, the maximum is attained by  $x$  such that for some  $j$ ,  $x_1 = \dots = x_j = \eta > x_{j+1} \geq \dots \geq x_d$ .

**Step 2:** If there is some  $k$  such that  $\eta > x_k \geq x_{k+1} > 0$ , then defining  $x'$  by letting  $(x'_k, x'_{k+1}) = (\min\{\eta, x_k + x_{k+1}\}, \max\{0, x_k + x_{k+1} - \eta\})$  while for other  $j$ ,  $x'_j = x_j$ , increases the value of  $f$ . Therefore, combined with Step 1, the maximum is attained by  $x$  such that for some  $j$ ,  $x_1 = \dots = x_j = \eta > x_{j+1} \geq 0$  and  $x_k = 0$  for all  $k > j + 1$ . Thus most one element lies in  $(0, \eta)$ .

Combining Step 1 and Step 2 above, we complete the proof of the claim, which further leads to (49).  $\square$

## D Trimmed-Mean-Based Method

In this section, we study the trimmed-mean-based estimator. Fix  $\omega \in (0, 1/2)$ . Specifically, for each  $k \in [d]$ , let  $\mathcal{U}_k$  be the subset of  $\{\lfloor \omega T \rfloor\}_{t \in [T]}$  obtained by removing the largest and smallest  $\omega T$  elements<sup>3</sup>. Then, the trimmed-mean-based method can be expressed as

$$\check{b}_k^* = \frac{1}{|\mathcal{U}_k|} \sum_{t \in \mathcal{U}_k} \check{b}_k^t. \quad (50)$$

We also write  $\check{\mathbf{b}}^* = \text{trmean}(\{\check{\mathbf{b}}^t\}_{t \in [T]}, \omega)$ . For any chosen trimming proportion  $0 \leq \eta \leq \omega \leq \frac{1}{5}$ , we control the estimation error of each  $\eta$ -well aligned entry. Intuitively, this is small because there are at most a fraction of  $\eta$  elements from heterogeneous distributions. These are trimmed if they behave as outliers, and otherwise kept in  $\mathcal{U}_k$ . The error control for a single entry  $k \in \mathcal{I}_\eta$  is in Lemma 11.

**Lemma 11.** *Suppose  $\check{\mathbf{b}}^* = \text{trmean}(\{\check{\mathbf{b}}^t\}_{t \in [T]}, \omega)$  such that  $0 \leq \omega \leq \frac{1}{5}$ . Then for each  $k \in \mathcal{I}_\eta$  with  $0 < \eta \leq \omega$  and any  $q = 1, 2$ , it holds that*

$$\mathbb{E}[|\check{b}_k^* - b_k^*|^q] = \tilde{O} \left( \left( \omega^2 \frac{b_k^*}{n} \right)^{q/2} + \left( \frac{b_k^*}{Tn} \right)^{q/2} + \frac{1}{(Tn)^q} + \left( \frac{\omega}{n} \right)^q \right). \quad (51)$$

*Proof.* To prove Lemma 11, we need the following lemma.

**Lemma 12.** *For each  $k \in \mathcal{I}_\eta$  with  $0 < \eta \leq \omega \leq \frac{1}{5}$ , and any  $\varepsilon_k, \delta_k \geq 0$ , it holds with probability at least  $1 - 2e^{-\frac{(T-|\mathcal{B}_k|)n}{4} \min\{\frac{\varepsilon_k^2}{\sigma_k^2}, \varepsilon_k\}} - 2(T-|\mathcal{B}_k|)e^{-\frac{n}{4} \min\{\frac{\delta_k^2}{\sigma_k^2}, \delta_k\}}$  that*

$$|\check{b}_k^* - b_k^*| \leq \frac{\varepsilon_k + 3\omega\delta_k}{1 - 2\omega}.$$

*Proof of Lemma 12.* By Bernstein's inequality and the union bound, we have for any  $\varepsilon_k, \delta_k > 0$  that

$$\mathbb{P} \left( \left| \frac{1}{T-|\mathcal{B}_k|} \sum_{t \in [T] \setminus \mathcal{B}_k} \check{b}_k^t - b_k^* \right| > \varepsilon_k \right) \leq 2e^{-\frac{(T-|\mathcal{B}_k|)n}{4} \min\{\frac{\varepsilon_k^2}{\sigma_k^2}, \varepsilon_k\}}$$

and

$$\mathbb{P} \left( \max_{t \in [T] \setminus \mathcal{B}_k} |\check{b}_k^t - b_k^*| > \delta_k \right) \leq 2(T-|\mathcal{B}_k|)e^{-\frac{n}{4} \min\{\frac{\delta_k^2}{\sigma_k^2}, \delta_k\}}.$$

By the definition of  $\check{b}_k^*$ , we have

$$\begin{aligned} |\check{b}_k^* - b_k^*| &= \frac{1}{T(1-2\omega)} \left| \sum_{t \in \mathcal{U}_k} \check{b}_k^t - b_k^* \right| \\ &= \frac{1}{T(1-2\omega)} \left| \sum_{t \in [T] \setminus \mathcal{B}_k} (\check{b}_k^t - b_k^*) - \sum_{t \in [T] \setminus (\mathcal{B}_k \cup \mathcal{U}_k)} (\check{b}_k^t - b_k^*) + \sum_{t \in \mathcal{B}_k \cap \mathcal{U}_k} (\check{b}_k^t - b_k^*) \right| \\ &\leq \frac{1}{T(1-2\omega)} \left( \left| \sum_{t \in [T] \setminus \mathcal{B}_k} \check{b}_k^t - b_k^* \right| + \left| \sum_{i \notin \mathcal{B}_k \cup \mathcal{U}_k} \check{b}_k^t - b_k^* \right| + \left| \sum_{t \in \mathcal{B}_k \cap \mathcal{U}_k} \check{b}_k^t - b_k^* \right| \right). \end{aligned}$$

It is clear that

$$\left| \sum_{t \in [T] \setminus (\mathcal{B}_k \cup \mathcal{U}_k)} (\check{b}_k^t - b_k^*) \right| \leq |[T] \setminus \mathcal{U}_k| \max_{t \in [T] \setminus \mathcal{B}_k} |\check{b}_k^t - b_k^*| = 2\omega T \max_{t \in [T] \setminus \mathcal{B}_k} |\check{b}_k^t - b_k^*|.$$

<sup>3</sup>To be precise, one can either trim  $\lceil \omega T \rceil$  or  $\lfloor \omega T \rfloor$  elements. From now on, we write  $\omega T$  for conciseness without further notice.

Then we claim that  $\left| \sum_{t \in \mathcal{B}_k \cap \mathcal{U}_k} \check{b}_k^t - b_k^* \right| \leq |\mathcal{B}_k| \max_{t \in [T] \setminus \mathcal{B}_k} |\check{b}_k^t - b_k^*|$ . Let  $\mathcal{Q}_{k,l}$  and  $\mathcal{Q}_{k,r}$  be the indices of the trimmed elements on the left side and right side, respectively, *i.e.*, the smallest and largest  $\omega T$  elements among  $\{\check{b}_k^t\}_{t \in [T]}$ . If  $\mathcal{B}_k \cap \mathcal{U}_k \neq \emptyset$ , then  $|\mathcal{U}_k \setminus \mathcal{B}_k| < T(1 - 2\omega)$ . Furthermore, we have  $|\mathcal{Q}_{k,l} \cup (\mathcal{U}_k \setminus \mathcal{B}_k)| = |\mathcal{Q}_{k,r} \cup (\mathcal{U}_k \setminus \mathcal{B}_k)| = \omega T + |\mathcal{U}_k \setminus \mathcal{B}_k| < T(1 - \omega) \leq |[T] \setminus \mathcal{B}_k|$ , which leads to  $([T] \setminus \mathcal{B}_k) \cap \mathcal{Q}_{k,l} \neq \emptyset$  and  $([T] \setminus \mathcal{B}_k) \cap \mathcal{Q}_{k,r} \neq \emptyset$ . In conclusion, we have  $\max_{t \in \mathcal{U}_k} |\check{b}_k^t - b_k^*| \leq \max_{t \in [T] \setminus \mathcal{B}_k} |\check{b}_k^t - b_k^*|$ , which completes the proof of the claim. Therefore, we have

$$|\check{b}_k^* - b_k^*| \leq \frac{1}{T(1 - 2\omega)} \left( \left| \sum_{t \in [T] \setminus \mathcal{B}_k} |\check{b}_k^t - b_k^*| \right| + (2\omega T + |\mathcal{B}_k|) \max_{t \in [T] \setminus \mathcal{B}_k} |\check{b}_k^t - b_k^*| \right) \leq \frac{\varepsilon_k + 3\omega\delta_k}{1 - 2\omega}$$

with probability at least  $1 - 2e^{-\frac{(T - |\mathcal{B}_k|)n}{4} \min\{\frac{\varepsilon_k^2}{\sigma_k^2}, \varepsilon_k\}} - 2(T - |\mathcal{B}_k|)e^{-\frac{n}{4} \min\{\frac{\delta_k^2}{\sigma_k^2}, \delta_k\}}$ .  $\square$

Given Lemma 12, by setting

$$\varepsilon_k = \max \left\{ \frac{4\sigma_k \sqrt{\ln(T^2 n^2)}}{\sqrt{(T - |\mathcal{B}_k|)n}}, \frac{8 \ln(T^2 n^2)}{(T - |\mathcal{B}_k|)n} \right\} = \tilde{O} \left( \frac{\sigma_k}{\sqrt{Tn}} + \frac{1}{Tn} \right)$$

and

$$\delta_k = \max \left\{ \frac{4\sigma_k \sqrt{\ln(T^2 (T - |\mathcal{B}_k|)n^2)}}{\sqrt{n}}, \frac{4 \ln(T^2 (T - |\mathcal{B}_k|)n^2)}{n} \right\} = \tilde{O} \left( \frac{\sigma_k}{\sqrt{n}} + \frac{1}{n} \right),$$

using that  $1/(1 - 2\omega) \leq \frac{5}{3}$ , and recalling  $\sigma_k \leq \sqrt{b_k^*}$ , we have with probability at least  $1 - \frac{4}{T^2 n^2}$  that

$$\begin{aligned} |\check{b}_k^* - b_k^*| &\leq \frac{\varepsilon_k + 3\omega\delta_k}{1 - 2\omega} \\ &\leq \frac{5\omega}{3} \max \left\{ \frac{4\sqrt{b_k^* \ln(T^3 n^2)}}{\sqrt{n}}, \frac{4 \ln(T^3 n^2)}{n} \right\} + \frac{5}{3} \max \left\{ \frac{4\sqrt{b_k^* \ln(T^2 n^2)}}{\sqrt{(T - |\mathcal{B}_k|)n}}, \frac{4 \ln(T^2 n^2)}{(T - |\mathcal{B}_k|)n} \right\} \\ &= \tilde{O} \left( \omega \sqrt{\frac{b_k^*}{n}} + \frac{\omega}{n} + \frac{\sigma_k}{\sqrt{Tn}} + \frac{1}{Tn} \right), \end{aligned} \quad (52)$$

which implies

$$\begin{aligned} \mathbb{E}[|\check{b}_k^* - b_k^*|] &= \tilde{O} \left( \omega \sqrt{\frac{b_k^*}{n}} + \frac{\omega}{n} + \frac{\sigma_k}{\sqrt{Tn}} + \frac{1}{Tn} + \frac{1}{T^2 n^2} \right) \\ &= \tilde{O} \left( \omega \sqrt{\frac{b_k^*}{n}} + \sqrt{\frac{b_k^*}{Tn}} + \frac{1}{Tn} + \frac{\omega}{n} \right). \end{aligned}$$

Similarly, we can obtain

$$\begin{aligned} \mathbb{E}[(\check{b}_k^* - b_k^*)^2] &= \tilde{O} \left( \frac{\omega^2 b_k^*}{n} + \frac{\omega^2}{n^2} + \frac{\sigma_k^2}{Tn} + \frac{1}{T^2 n^2} + \frac{1}{T^2 n^2} \right) \\ &= \tilde{O} \left( \omega^2 \frac{b_k^*}{n} + \frac{b_k^*}{Tn} + \frac{1}{T^2 n^2} + \frac{\omega^2}{n^2} \right). \end{aligned}$$

$\square$

Given these results, we readily establish the following bound on the total error over all  $\eta$ -well-aligned entries.

**Proposition 5.** Suppose  $\check{\mathbf{b}}^* = \text{trmean}(\{\check{\mathbf{b}}^t\}_{t \in [T]}, \omega)$  such that  $0 \leq \omega \leq 1/5$ . Then for each  $k \in \mathcal{I}_\eta$  with  $0 < \eta \leq \omega$  and any  $q = 1, 2$ , it holds that

$$\mathbb{E}[\|\check{b}_{\mathcal{I}_\eta}^* - b_{\mathcal{I}_\eta}^*\|_q^q] = \tilde{O} \left( d \left( \frac{\omega^2}{2^b n} \right)^{q/2} + \frac{d}{(2^b T n)^{q/2}} + \frac{d}{(T n)^q} + d \left( \frac{\omega}{n} \right)^q \right).$$

By setting  $\alpha = \Theta(\ln(Tn))$ , we find the following result.

**Theorem 7.** Suppose  $n \geq 2^{b+5} \ln(Tn)$  and  $\alpha \geq 2(8 + \sqrt{8 \ln(Tn)})^2$  with  $\alpha = O(\ln(Tn))$ . Then for the trimmed-mean-based SHIFT method, for any  $0 < \omega \leq \frac{1}{5}$ ,  $t \in [T]$  and  $q = 1, 2$ ,

$$\mathbb{E} [\|\hat{\mathbf{p}}^t - \mathbf{p}^t\|_q^q] = \tilde{O} \left( \left( \frac{s}{\omega} \right)^{1-q/2} \left( \frac{\max\{2^b, s/\omega\}}{2^b n} \right)^{q/2} + d \left( \frac{\omega^2}{2^b n} \right)^{q/2} + \frac{d}{(2^b T n)^{q/2}} \right).$$

*Proof.* To apply Proposition 3, we need to bound  $\sum_{k \in \mathcal{I}_\eta \cap \mathcal{I}^t} \min\{\mathbb{P}(k \notin \mathcal{K}_\alpha^t), \sqrt{b_k^t(1 - b_k^t)/n}\}$  and  $\sum_{k \in \mathcal{I}_\eta \cap \mathcal{I}^t} \min\{\mathbb{P}(k \notin \mathcal{K}_\alpha^t), b_k^t(1 - b_k^t)/n\}$ .

Let  $\mathcal{E}_k^t := \{\check{b}_k^t \geq \frac{1}{2}b_k^t \text{ and } |\check{b}_k^t - b_k^t| \leq 8\sqrt{b_k^* \ln(T^3 n^2)/n}\}$ . For each entry  $k \in \mathcal{I}_\eta \cap \mathcal{I}^t$ , since  $n \geq 2^b \ln(T^3 n^2)$  and  $b_k^* \leq \frac{1}{2^b}$ , we have  $\frac{1}{n} \leq \sqrt{\frac{b_k^*}{n \ln(T^3 n^2)}}$ . By (52), we have with probability at least  $1 - \frac{4}{T^2 n^2}$  that

$$\begin{aligned} |\check{b}_k^t - b_k^t| &\leq \frac{5\omega}{3} \max \left\{ \frac{4\sqrt{b_k^* \ln(T^3 n^2)}}{\sqrt{n}}, \frac{4 \ln(T^3 n^2)}{n} \right\} + \frac{5}{3} \max \left\{ \frac{4\sqrt{b_k^* \ln(T^2 n^2)}}{\sqrt{(T - |\mathcal{B}_k|)n}}, \frac{4 \ln(T^2 n^2)}{(T - |\mathcal{B}_k|)n} \right\} \\ &\leq \frac{4}{3} \sqrt{\frac{b_k^* \ln(T^3 n^2)}{n}} + \frac{20}{3} \sqrt{\frac{b_k^* \ln(T^2 n^2)}{(T - |\mathcal{B}_k|)n}} \leq 8 \sqrt{\frac{b_k^* \ln(T^3 n^2)}{n}}. \end{aligned} \quad (53)$$

By Bernstein's inequality and as  $b_k^* \geq \frac{1}{2^b}$ , we have

$$\mathbb{P} \left( |\check{b}_k^t - b_k^t| > \frac{b_k^t}{2} \right) \leq 2e^{-\frac{n}{4} \min\{\frac{b_k^t}{4(1-b_k^*)}, \frac{b_k^t}{2}\}} \leq 2e^{-\frac{nb_k^t}{16}} \leq 2e^{-\frac{n}{16 \cdot 2^b}} \leq \frac{2}{T^2 n^2}, \quad (54)$$

where the last inequality is because  $n \geq 2^{b+5} \ln(Tn)$ . Combining (53) with (54), we find  $\mathbb{P}((\mathcal{E}_k^t)^c) \leq \frac{6}{T^2 n^2}$ . Now following the argument from (41)-(43), we can obtain that for all  $k \in \mathcal{I}_\eta \cap \mathcal{I}^t$ ,

$$\mathbb{P}(k \notin \mathcal{K}_\alpha^t) = O \left( \frac{1}{T^2 n^2} \right).$$

Since  $\alpha = O(\ln(Tn))$ , by applying (43) to Proposition 3 with  $\eta = \omega$  and using Proposition 5 with  $n = \Omega(2^b)$ , we find

$$\mathbb{E} [\|\hat{\mathbf{b}}^t - \mathbf{b}^t\|_1] = \tilde{O} \left( \sum_{k \notin \mathcal{I}_\omega \cap \mathcal{I}^t} \sqrt{\frac{b_k^t}{n}} + \frac{d\omega}{\sqrt{2^b n}} + \frac{d}{\sqrt{2^b T n}} \right) \quad (55)$$

and

$$\mathbb{E} [\|\hat{\mathbf{b}}^t - \mathbf{b}^t\|_2^2] = \tilde{O} \left( \sum_{k \notin \mathcal{I}_\omega \cap \mathcal{I}^t} \frac{b_k^t}{n} + \frac{d\omega}{2^b n} + \frac{d}{2^b T n} \right).$$

Note that  $|(\mathcal{I}_\omega \cap \mathcal{I}^t)^c| \leq |\mathcal{I}_\omega^c| + |(\mathcal{I}^t)^c| \leq s/\omega + s = O(s/\omega)$  and

$$\begin{aligned} \sum_{k \notin \mathcal{I}_\omega \cap \mathcal{I}^t} \sqrt{\frac{b_k^t}{n}} &\leq \sqrt{|\mathcal{I}_\omega \cap \mathcal{I}^t|^c| \sum_{k \notin \mathcal{I}_\omega \cap \mathcal{I}^t} \frac{b_k^t}{n}} = \sqrt{\frac{|\mathcal{I}_\omega \cap \mathcal{I}^t|^c| \max\{2^b, |(\mathcal{I}_\omega \cap \mathcal{I}^t)^c|\}}{2^b n}} \\ &= \sqrt{\frac{s/\omega \max\{2^b, s/\omega\}}{2^b n}}. \end{aligned} \quad (56)$$

Plugging (56) into (55) and using  $\mathbb{E} [\|\hat{\mathbf{p}}^t - \mathbf{p}^t\|_1] = O(\mathbb{E} [\|\hat{\mathbf{b}}^t - \mathbf{b}^t\|_1])$ , we find the conclusion in terms of the  $\ell_1$  error. The results in terms of the  $\ell_2$  error can be obtained similarly.  $\square$

## E Lower Bounds

In this section, we provide the proofs for the minimax lower bounds for estimating distributions under our heterogeneity model. We first re-state the detailed version the lower bounds that apply to both the  $\ell_2$  and  $\ell_1$  errors.

**Theorem 8** (Detailed statement of Theorem 3). *For any—possibly interactive—estimation method, and for any  $t \in [T]$  and  $q = 1, 2$ , we have*

$$\inf_{\substack{(W^{t'}, [n])_{t' \in [T]} \\ \hat{\mathbf{p}}^t}} \sup_{\substack{\mathbf{p}^* \in \mathcal{P}_d \\ \{\mathbf{p}^{t'} : t' \in [T]\} \subseteq \mathbb{B}_s(\mathbf{p}^*)}} \mathbb{E}[\|\hat{\mathbf{p}}^t - \mathbf{p}^t\|_q^q] = \Omega \left( s^{1-q/2} \left( \frac{\max\{2^b, s\}}{2^b n} \right)^{q/2} + \frac{d}{(2^b T n)^{q/2}} \right). \quad (57)$$

**Theorem 9** (Detailed statement of Theorem. 4). *For any—possibly interactive—estimation method, and a new cluster  $\mathcal{C}^{T+1}$ , we have*

$$\begin{aligned} & \inf_{\substack{(W^{t'}, [n])_{t' \in [T]} \\ W^{T+1, [\tilde{n}], \hat{\mathbf{p}}^{T+1}}} \sup_{\substack{\mathbf{p}^* \in \mathcal{P}_d \\ \{\mathbf{p}^{t'} : t' \in [T+1]\} \subseteq \mathbb{B}_s(\mathbf{p}^*)}} \mathbb{E}[\|\hat{\mathbf{p}}^{T+1} - \mathbf{p}^{T+1}\|_q^q] \\ &= \Omega \left( s^{1-q/2} \left( \frac{\max\{2^b, s\}}{2^b \tilde{n}} \right)^{q/2} + \frac{d}{(2^b T n)^{q/2}} \right). \end{aligned}$$

We omit the proof of Theorem 9 since it follows from the same analysis as Theorem 8.

### E.1 Proof of Theorem 8

As discussed in Section 4, we will prove (57) by considering two special cases of our sparse heterogeneity model:

1. The *homogeneous* case where  $\mathbf{p}^1 = \dots = \mathbf{p}^T = \mathbf{p}^* \in \mathcal{P}_d$ .
2. The *s/2-sparse* case where  $\|\mathbf{p}^*\|_0 \leq s/2$  and  $\|\mathbf{p}^t\|_0 \leq s/2$  for all  $t \in [T]$ .

Therefore, it naturally holds that

$$\inf_{\substack{(W^{t'}, [n])_{t' \in [T]} \\ \hat{\mathbf{p}}^t}} \sup_{\substack{\mathbf{p}^* \in \mathcal{P}_d \\ \{\mathbf{p}^{t'} : t' \in [T]\} \subseteq \mathbb{B}_s(\mathbf{p}^*)}} \mathbb{E}[\|\hat{\mathbf{p}}^t - \mathbf{p}^t\|_q^q] \geq \inf_{\substack{(W^{t'}, [n])_{t' \in [T]} \\ \hat{\mathbf{p}}^*}} \sup_{\mathbf{p}^* \in \mathcal{P}_d} \mathbb{E}[\|\hat{\mathbf{p}}^* - \mathbf{p}^*\|_q^q] \quad (58)$$

and

$$\inf_{\substack{(W^{t'}, [n])_{t' \in [T]} \\ \hat{\mathbf{p}}^t}} \sup_{\substack{\mathbf{p}^* \in \mathcal{P}_d \\ \{\mathbf{p}^{t'} : t' \in [T]\} \subseteq \mathbb{B}_s(\mathbf{p}^*)}} \mathbb{E}[\|\hat{\mathbf{p}}^t - \mathbf{p}^t\|_q^q] \geq \inf_{\substack{(W^{t'}, [n])_{t' \in [T]} \\ \hat{\mathbf{p}}^t}} \sup_{\substack{\|\mathbf{p}^{t'}\|_0 \leq s/2 \\ \forall t' \in [T]}} \mathbb{E}[\|\hat{\mathbf{p}}^t - \mathbf{p}^t\|_q^q]. \quad (59)$$

For the first case, combining (58) with the existing lower bound result [6, Cor 7] and [26, Thm 2] for the homogeneous setup, where all datapoints are generated by a single distribution, that for any estimation method (possibly based on interactive encoding),

$$\inf_{\substack{(W^{t'}, [n])_{t' \in [T]} \\ \hat{\mathbf{p}}^*}} \sup_{\mathbf{p}^* \in \mathcal{P}_d} \mathbb{E}[\|\hat{\mathbf{p}}^* - \mathbf{p}^*\|_q^q] = \Omega \left( \frac{d}{(2^b T n)^{q/2}} \right),$$

we prove that the lower bound is at least of the order of the second term in (57).

For the second case, without loss of generality, we assume  $s$  is even. This can be achieved by considering  $s-1$  instead of  $s$ , if necessary. Recall that  $\text{supp}(\cdot)$  denotes the indices of non-zero entries of a vector. Fixing any  $t \in [T]$ , we further consider the scenario where

$$\text{supp}(\mathbf{p}^t) \cap \left( \bigcup_{t' \neq t} \text{supp}(\mathbf{p}^{t'}) \right) = \emptyset. \quad (60)$$

One example where (60) holds is when  $\text{supp}(\mathbf{p}^t) \subseteq [s/2]$  and  $\text{supp}(\mathbf{p}^{t'}) \subseteq \{s/2+1, \dots, d\}$  for all  $t' \neq t$ . If (60) holds, then the support of the datapoints generated by  $\{\mathbf{p}^{t'} : t' \neq t\}$  does not

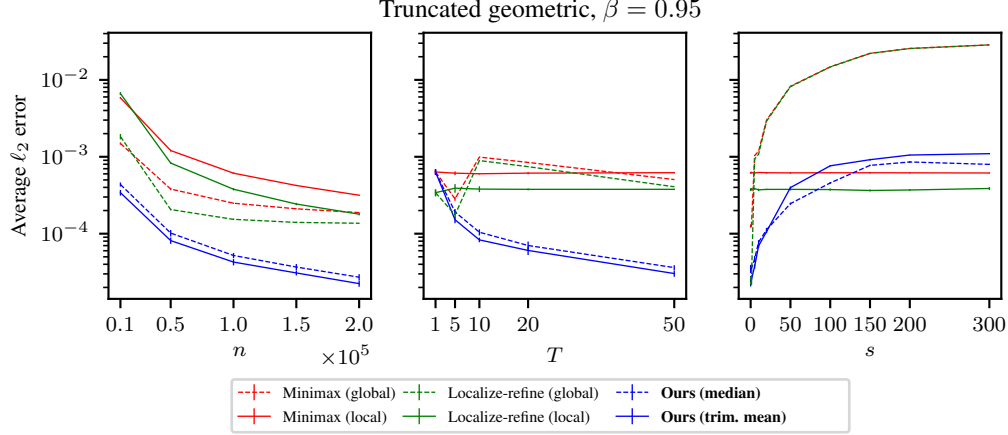

Figure 3: Average  $\ell_2$  estimation error in synthetic experiment using the truncated geometric distribution. (Left): Fixing  $s = 5$ ,  $T = 30$  and varying  $n$ . (Middle): Fixing  $s = 5$ ,  $n = 100,000$  and varying  $T$ . (Right): Fixing  $T = 30$ ,  $n = 100,000$  and varying  $s$ . The standard error bars are obtained from 10 independent runs.

overlap with the support of those generated by  $\mathbf{p}^t$ , and hence former are not informative for estimating  $\mathbf{p}^t$ . Therefore, by further combining (59) with the existing lower bound result [14, Thm 2] for the  $s/2$ -sparse homogeneous setup, where all datapoints are generated by a single  $s/2$ -sparse distribution, that for any estimation method (possibly based on interactive encoding),

$$\begin{aligned} \inf_{(W^{t,[n]})} \sup_{\substack{\|\mathbf{p}^t\|_0 \leq s/2 \\ \mathbf{p}^t \in \mathcal{P}_d}} \mathbb{E}[\|\hat{\mathbf{p}}^t - \mathbf{p}^t\|_q^q] &= \Omega \left( (s/2)^{1-q/2} \left( \frac{\max\{2^b, s/2\}}{2^b n} \right)^{q/2} \right) \\ &= \Omega \left( s^{1-q/2} \left( \frac{\max\{2^b, s\}}{2^b n} \right)^{q/2} \right). \end{aligned}$$

Thus, we have

$$\begin{aligned} &\inf_{(W^{t',[n]})_{t' \in [T]}} \sup_{\substack{\mathbf{p}^* \in \mathcal{P}_d \\ \{\mathbf{p}^{t'} : t' \in [T]\} \subseteq \mathbb{B}_s(\mathbf{p}^*)}} \mathbb{E}[\|\hat{\mathbf{p}}^t - \mathbf{p}^t\|_q^q] \geq \inf_{(W^{t',[n]})_{t' \in [T]}} \sup_{\substack{\mathbf{p}^{t'} \in \mathcal{P}_d \\ \forall t' \in [T] \|\mathbf{p}^{t'}\|_0 \leq s/2}} \mathbb{E}[\|\hat{\mathbf{p}}^t - \mathbf{p}^t\|_q^q] \\ &\geq \inf_{(W^{t',[n]})_{t' \in [T]}} \sup_{\substack{\|\mathbf{p}^{t'}\|_0 \leq s/2, \forall t' \in [T] \\ \hat{\mathbf{p}}^t \text{ (60) holds}}} \mathbb{E}[\|\hat{\mathbf{p}}^t - \mathbf{p}^t\|_q^q] = \inf_{(W^{t,[n]})} \sup_{\|\mathbf{p}^t\|_0 \leq s/2} \mathbb{E}[\|\hat{\mathbf{p}}^t - \mathbf{p}^t\|_q^q] \\ &= \Omega \left( s^{1-q/2} \left( \frac{\max\{2^b, s\}}{2^b n} \right)^{q/2} \right). \end{aligned}$$

This proves that the lower bound is at least of the order of the first term in (57). Overall, we conclude the desired result.

## F Supplementary Experiments

**Truncated geometric distribution** We consider the truncated geometric distribution with parameter  $\beta \in (0, 1)$ ,  $\mathbf{p}^* = \frac{1-\beta}{1-\beta^d} (1, \beta, \dots, \beta^{d-1})$ , as the central distribution and repeat the experiment in Section 5.1. We use  $d = 300$ ,  $\beta = 0.95$ ,  $b = 2$  and vary  $n, T, s$ . Figure 3 summarizes the results. As in Section 5.1, we observe that our methods outperform the baseline methods in most cases, especially when  $s$  is small. Also, we see the benefit of collaboration, *i.e.*, decreasing trend of the error as  $T$  increases, only in our methods.

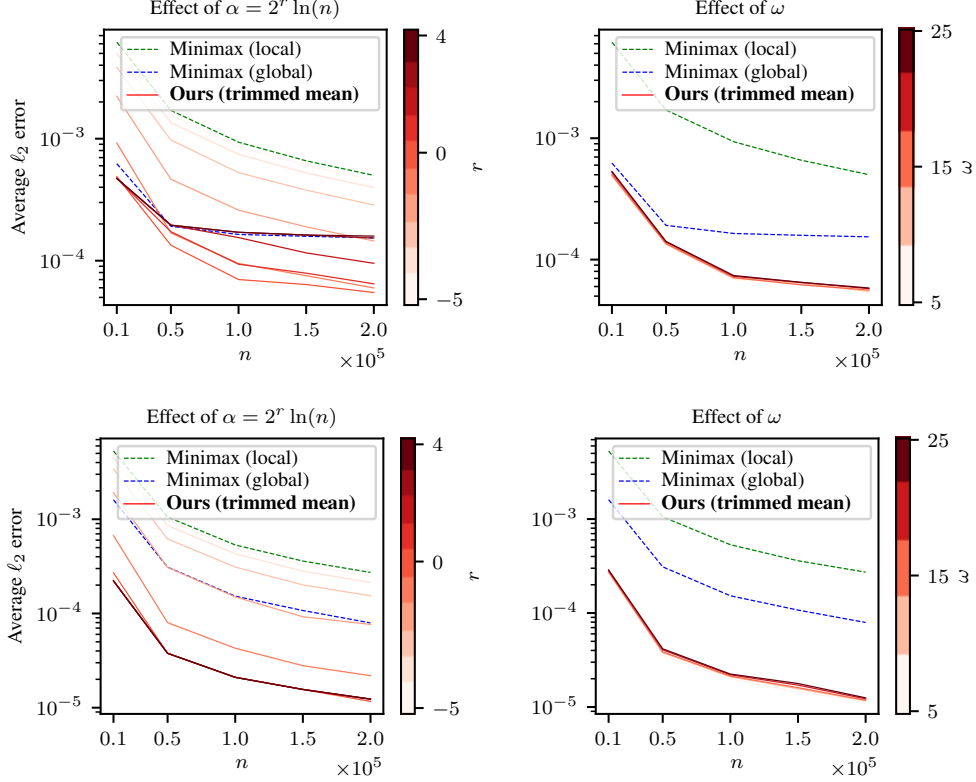

Figure 4: Effect of the hyperparameters  $\alpha$  and  $\omega$ . The top row shows results for the uniform distribution and the bottom row shows the results for the truncated geometric distribution with  $\beta = 0.8$ .

**Hyperparameter selection.** We provide additional experiments using different hyperparameters  $\alpha$  and  $\omega$  from discussed in Section 5.1. All other settings are identical to Section 5.1. We test the hyperparameters  $(\alpha, \omega) = (2^r \ln(n), 0.1)$  for  $r \in \{-5, -4, \dots, 4\}$  and  $(\alpha, \omega) = (\ln(n), \omega)$  for  $\omega \in \{0.05, 0.1, \dots, 0.25\}$ . Figure 4 summarizes the results.

We find that setting the threshold  $\alpha$  too small leads to replacing almost all coordinates of the central estimate  $\hat{\mathbf{p}}^*$  with local ones. In the extreme case of  $\alpha \approx 0$ , our method is essentially returns the local minimax estimates. On the other hand, we observe that the performance of our method is less sensitive to the trimming proportion  $\omega$ .

While the choice of  $\alpha$  is crucial to the performance of our method, we argue that it is possible to select a reasonably good  $\alpha$  by checking the number of fine-tuned entries, *i.e.*,

$$\frac{1}{T} \sum_{t=1}^T \left| \left\{ k \in [d] : |[\hat{\mathbf{b}}^*]_k - [\hat{\mathbf{b}}^t]_k| > \sqrt{\frac{\alpha [\hat{\mathbf{b}}^t]_k}{n}} \right\} \right|.$$

In Figure 5, we observe that more than half ( $d/2 = 150$ ) of the entries are fine-tuned when  $r \in \{-5, -4, -3\}$ . These correspond to the three curves in the top left of Figure 4 that perform no better than the baseline methods. In conclusion, by selecting  $\alpha$  such that the number of fine-tuned entries are small enough compared to  $d$ , it is possible to reproduce the results in Section 5.

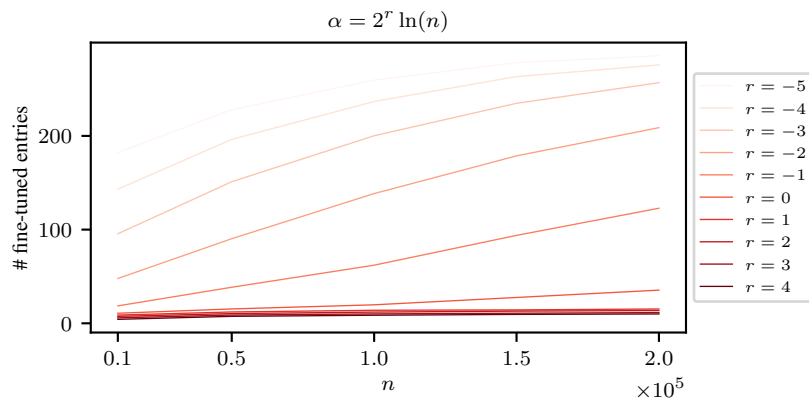

Figure 5: Average number of fine-tuned entries for different values of  $\alpha = 2^r \ln(n)$ . We use the trimmed mean with  $\omega = 0.1$  and the uniform distribution with  $d = 300$ . This corresponds to the top left of Figure 4.
